# Supplementary material
Source: HighWire-hosted journal article supplement (https://bmjopen.bmj.com/content/9/7/e025784)
Supplement: inline-supplementary-material-2 [file inline-supplementary-material-2.pdf]

**S2 Table. Baseline table per chronic kidney disease stage per location.**

| CKD stage 3a                        | Clinic A (N=92)         |                            | Clinic B (N=255)        |                            | Clinic C (N=496)        |                            |
|-------------------------------------|-------------------------|----------------------------|-------------------------|----------------------------|-------------------------|----------------------------|
|                                     | N (%)                   | Mean (±SD)                 | N (%)                   | Mean (±SD)                 | N (%)                   | Mean (±SD)                 |
| Age (years)                         | 92 (100)                | 56.8 (±13.5)               | 255 (100)               | 60.5 (±14.9)               | 496 (100)               | 65.6 (±13.4)               |
| < 50 years                          | 26 (28.3)               |                            | 56 (22.0)               |                            | 69 (13.9)               |                            |
| 50-80 years                         | 62 (67.4)               |                            | 182 (71.4)              |                            | 360 (72.6)              |                            |
| ≥ 80 years                          | 4 (4.4)                 |                            | 17 (6.7)                |                            | 67 (13.5)               |                            |
| Gender (males)                      | 46 (50.0)               |                            | 135 (52.9)              |                            | 275 (55.4)              |                            |
| Diabetes (yes)                      | 14 (15.2)               |                            | 39 (15.3)               |                            | 43 (8.7)                |                            |
| eGFR (MDRD) ml/min                  | 92 (100)                | 51.1 (±4.2)                | 255 (100)               | 52.4 (±4.2)                | 496 (100)               | 52.3 (±4.4)                |
| SBP (mmHg)                          | 91 (98.9)               | 126.3 (±17.4)              | 122 (47.8)              | 128.5 (±18.8)              | 388 (78.2)              | 130.4 (±16.7)              |
| Elevated SBP (>140 mmHg)            | 12 (13.0)               | 157.1 (±15.7)              | 23 (9.0)                | 157.4 (±12.9)              | 84 (16.9)               | 154.5 (±11.7)              |
| DBP (mmHg)                          | 91 (98.9)               | 73.4 (±12.5)               | 122 (47.8)              | 76.0 (±10.5)               | 388 (78.2)              | 77.6 (±10.0)               |
| Low DBP (<70 mmHg)                  | 31 (33.7)               | 59.8 (±6.1)                | 22 (8.6)                | 61.3 (±4.4)                | 77 (15.5)               | 63.2 (±5.2)                |
| Total protein (g/24h urine)         | 84 (91.3)               | 0.2 [0.1-1.0] <sup>a</sup> | 62 (24.3)               | 0.5 [0.3-1.3] <sup>a</sup> | 132 (26.6)              | 0.2 [0.1-0.5] <sup>a</sup> |
| Total protein (g/l urine)           | 84 (91.3)               | 0.1 [0.1-0.4] <sup>a</sup> | 165 (65.7)              | 0.1 [0.0-0.4] <sup>a</sup> | 303 (61.1)              | 0.1 [0.1-0.3] <sup>a</sup> |
| Proteinuria (>0.5 g/24h or L urine) | 29 (31.5)               |                            | 52 (20.4)               |                            | 59 (11.9)               |                            |
| Phosphate (mmol/l)                  | 83 (90.2)               | 1.02 (±0.20)               | 139 (54.5)              | 0.98 (±0.22)               | 317 (63.9)              | 0.94 (±0.19)               |
| Elevated phosphate (>1.49 mmol/l)   | 0 (0.0)                 | -                          | 2 (0.8)                 | 1.72 (±0.30)               | 1 (0.2)                 | 1.63 (-)                   |
| Calcium (mmol/l)                    | 84 (91.3)               | 2.38 (±0.14)               | 159 (62.4)              | 2.37 (±0.11)               | 373 (75.2)              | 2.38 (±0.11)               |
| Elevated Calcium (>2.54 mmol/l)     | 6 (6.5)                 | 2.60 (±0.05)               | 7 (2.7)                 | 2.62 (±0.06)               | 27 (5.4)                | 2.62 (±0.08)               |
| Haemoglobin level (mmol/l)          | 90 (97.8)               | 8.4 (±1.2)                 | 231 (90.6)              | 8.6 (±1.0)                 | 450 (90.7)              | 8.4 (±1.0)                 |
| Low haemoglobin level (<7.5 mmol/l) | 15 (16.3)               | 6.6 (±0.5)                 | 29 (11.4)               | 6.8 (±0.6)                 | 69 (13.9)               | 6.8 (±0.6)                 |
| <b>CKD stage 3b</b>                 | <b>Clinic A (N=166)</b> |                            | <b>Clinic B (N=295)</b> |                            | <b>Clinic C (N=664)</b> |                            |
|                                     | <b>N (%)</b>            | <b>Mean (±SD)</b>          | <b>N (%)</b>            | <b>Mean (±SD)</b>          | <b>N (%)</b>            | <b>Mean (±SD)</b>          |
| Age                                 | 166 (100)               | 63.4 (±14.3)               | 295 (100)               | 66.9 (±14.8)               | 664 (100)               | 71.2 (±11.5)               |
| < 50 years                          | 33 (19.9)               |                            | 40 (13.6)               |                            | 40 (6.0)                |                            |
| 50-80 years                         | 115 (69.3)              |                            | 200 (67.8)              |                            | 478 (72.0)              |                            |
| ≥ 80 years                          | 18 (10.8)               |                            | 55 (18.6)               |                            | 146 (22.0)              |                            |
| Gender (males)                      | 98 (59.0)               |                            | 147 (49.8)              |                            | 369 (55.6)              |                            |
| Diabetes (yes)                      | 44 (26.5)               |                            | 54 (18.3)               |                            | 68 (10.2)               |                            |
| eGFR (MDRD) ml/min                  | 166 (100)               | 36.4 (±4.4)                | 295 (100)               | 37.6 (±4.1)                | 664 (100)               | 37.4 (±4.2)                |

|                                     |                         |                            |                         |                            |                         |                            |
|-------------------------------------|-------------------------|----------------------------|-------------------------|----------------------------|-------------------------|----------------------------|
| SBP (mmHg)                          | 163 (98.2)              | 129.6 (±17.0)              | 160 (54.2)              | 131.6 (±21.0)              | 587 (88.4)              | 130.7 (±18.3)              |
| Elevated SBP (>140 mmHg)            | 33 (19.9)               | 153.8 (±14.2)              | 49 (16.6)               | 156.6 (±12.9)              | 157 (23.4)              | 153.7 (±11.9)              |
| DBP (mmHg)                          | 163 (98.2)              | 72.4 (±12.4)               | 160 (54.2)              | 75.5 (±10.3)               | 587 (88.4)              | 75.4 (±11.1)               |
| Low DBP (<70 mmHg)                  | 61 (36.7)               | 60.2 (±6.6)                | 35 (11.9)               | 61.8 (±4.2)                | 186 (28.0)              | 62.8 (±5.0)                |
| Total protein (g/24h urine)         | 148 (89.2)              | 0.2 [0.1-0.6] <sup>a</sup> | 67 (22.7)               | 0.7 [0.2-2.0] <sup>a</sup> | 211 (31.8)              | 0.2 [0.1-0.7] <sup>a</sup> |
| Total protein (g/l urine)           | 150 (90.4)              | 0.2 [0.1-0.4] <sup>a</sup> | 190 (64.4)              | 0.2 [0.1-0.5] <sup>a</sup> | 501 (75.5)              | 0.2 [0.1-0.4] <sup>a</sup> |
| Proteinuria (>0.5 g/24h or L urine) | 39 (23.5)               |                            | 63 (21.4)               |                            | 122 (18.4)              |                            |
| Phosphate (mmol/l)                  | 160 (96.4)              | 1.04 (±0.21)               | 213 (72.2)              | 1.02 (±0.22)               | 586 (88.3)              | 0.98 (±0.19)               |
| Elevated phosphate (>1.49 mmol/l)   | 5 (3.0)                 | 1.58 (±0.04)               | 6 (2.0)                 | 1.80 (±0.28)               | 6 (0.9)                 | 1.57 (±0.08)               |
| Calcium (mmol/l)                    | 160 (96.4)              | 2.37 (±0.15)               | 231 (78.3)              | 2.34 (±0.12)               | 607 (91.4)              | 2.37 (±0.13)               |
| Elevated Calcium (>2.54 mmol/l)     | 10 (6.0)                | 2.62 (±0.06)               | 7 (2.4)                 | 2.61 (±0.06)               | 44 (6.6)                | 2.63 (±0.10)               |
| Haemoglobin level (mmol/l)          | 166 (100)               | 8.1 (±1.0)                 | 284 (96.3)              | 8.1 (±1.1)                 | 645 (97.1)              | 8.2 (±1.0)                 |
| Low haemoglobin level (<7.5 mmol/l) | 37 (22.2)               | 6.9 (±0.5)                 | 81 (27.5)               | 6.8 (±0.5)                 | 146 (22.0)              | 6.8 (±0.5)                 |
| <b>CKD stage 4</b>                  | <b>Clinic A (N=183)</b> |                            | <b>Clinic B (N=219)</b> |                            | <b>Clinic C (N=460)</b> |                            |
|                                     | <b>N (%)</b>            | <b>Mean (±SD)</b>          | <b>N (%)</b>            | <b>Mean (±SD)</b>          | <b>N (%)</b>            | <b>Mean (±SD)</b>          |
| Age                                 | 183 (100)               | 65.3 (±14.6)               | 219 (100)               | 67.4 (±15.2)               | 460 (100)               | 73.4 (±11.8)               |
| < 50 years                          | 24 (13.1)               |                            | 26 (11.9)               |                            | 20 (4.4)                |                            |
| 50-80 years                         | 126 (68.9)              |                            | 149 (68.0)              |                            | 281 (61.1)              |                            |
| >= 80 years                         | 33 (18.0)               |                            | 44 (20.1)               |                            | 159 (34.6)              |                            |
| Gender (males)                      | 98 (53.6)               |                            | 119 (54.3)              |                            | 271 (58.9)              |                            |
| Diabetes (yes)                      | 55 (30.1)               |                            | 58 (26.5)               |                            | 52 (11.3)               |                            |
| eGFR (MDRD) ml/min                  | 183 (100)               | 22.3 (±4.2)                | 219 (100)               | 23.0 (±4.3)                | 460 (100)               | 23.4 (±4.2)                |
| SBP (mmHg)                          | 176 (96.2)              | 132.0 (±19.4)              | 140 (63.9)              | 136.8 (±21.0)              | 419 (91.1)              | 132.6 (±18.7)              |
| Elevated SBP (>140 mmHg)            | 48 (26.2)               | 156.8 (±11.4)              | 50 (22.8)               | 159.1 (±13.8)              | 135 (29.3)              | 153.5 (±11.5)              |
| DBP (mmHg)                          | 176 (96.2)              | 71.6 (±12.8)               | 140 (63.9)              | 75.1 (±10.9)               | 419 (91.1)              | 75.7 (±10.3)               |
| Low DBP (<70 mmHg)                  | 66 (36.1)               | 59.0 (±7.6)                | 38 (17.4)               | 61.7 (±4.7)                | 110 (23.9)              | 62.6 (±5.1)                |
| Total protein (g/24h urine)         | 163 (89.1)              | 0.4 [0.1-1.0] <sup>a</sup> | 75 (34.2)               | 0.9 [0.3-2.3] <sup>a</sup> | 165 (35.9)              | 0.4 [0.2-1.3] <sup>a</sup> |
| Total protein (g/l urine)           | 163 (89.1)              | 0.2 [0.1-0.6] <sup>a</sup> | 162 (74.0)              | 0.3 [0.2-0.8] <sup>a</sup> | 362 (78.7)              | 0.2 [0.1-0.6] <sup>a</sup> |
| Proteinuria (>0.5 g/24h or L urine) | 63 (34.4)               |                            | 77 (35.2)               |                            | 128 (27.8)              |                            |
| Phosphate (mmol/l)                  | 176 (96.2)              | 1.18 (±0.23)               | 200 (91.3)              | 1.14 (±0.32)               | 439 (95.4)              | 1.05 (±0.2)                |
| Elevated phosphate (>1.49 mmol/l)   | 16 (8.7)                | 1.62 (±0.11)               | 17 (7.8)                | 1.84 (±0.47)               | 8 (1.7)                 | 1.66 (±0.11)               |
| Calcium (mmol/l)                    | 176 (96.2)              | 2.35 (±0.20)               | 199 (90.9)              | 2.34 (±0.16)               | 447 (97.2)              | 2.36 (±0.12)               |
| Elevated Calcium (>2.54 mmol/l)     | 13 (7.1)                | 2.61 (±0.07)               | 9 (4.1)                 | 2.65 (±0.07)               | 24 (5.2)                | 2.62 (±0.06)               |

|                                     |                         |                                  |                        |                                  |                        |                                  |
|-------------------------------------|-------------------------|----------------------------------|------------------------|----------------------------------|------------------------|----------------------------------|
| Haemoglobin level (mmol/l)          | 182 (99.5)              | 7.6 ( $\pm 1.0$ )                | 217 (99.1)             | 7.7 ( $\pm 1.2$ )                | 458 (99.6)             | 7.8 ( $\pm 1.0$ )                |
| Low haemoglobin level (<7.5 mmol/l) | 82 (44.8)               | 6.7 ( $\pm 0.7$ )                | 89 (40.6)              | 6.6 ( $\pm 0.6$ )                | 175 (38.0)             | 6.7 ( $\pm 0.6$ )                |
| <b>CKD stage 5</b>                  | <b>Clinic A (N=128)</b> |                                  | <b>Clinic B (N=76)</b> |                                  | <b>Clinic C (N=98)</b> |                                  |
|                                     | <b>N (%)</b>            | <b>Mean (<math>\pm</math>SD)</b> | <b>N (%)</b>           | <b>Mean (<math>\pm</math>SD)</b> | <b>N (%)</b>           | <b>Mean (<math>\pm</math>SD)</b> |
| Age                                 | 128 (100)               | 65.5 ( $\pm 14.7$ )              | 100 (76)               | 65.5 ( $\pm 15.9$ )              | 100 (98)               | 76.9 ( $\pm 10.6$ )              |
| < 50 years                          | 15 (11.7)               |                                  | 12 (15.8)              |                                  | 2 (2.0)                |                                  |
| 50-80 years                         | 94 (73.4)               |                                  | 40 (65.8)              |                                  | 52 (53.1)              |                                  |
| >= 80 years                         | 19 (14.8)               |                                  | 14 (18.4)              |                                  | 44 (44.9)              |                                  |
| Gender (males)                      | 81 (63.3)               |                                  | 45 (59.2)              |                                  | 54 (55.1)              |                                  |
| Diabetes (yes)                      | 32 (25.0)               |                                  | 13 (17.1)              |                                  | 13 (13.3)              |                                  |
| eGFR (MDRD) ml/min                  | 128 (100)               | 10.5 ( $\pm 2.6$ )               | 76 (100)               | 11.2 ( $\pm 2.4$ )               | 98 (100)               | 11.9 ( $\pm 2.6$ )               |
| SBP (mmHg)                          | 122 (95.3)              | 137.9 ( $\pm 18.6$ )             | 48 (63.2)              | 142.1 ( $\pm 19.8$ )             | 95 (96.9)              | 139.2 ( $\pm 19.7$ )             |
| Elevated SBP (>140 mmHg)            | 44 (34.4)               | 157.1 ( $\pm 12.2$ )             | 21 (27.6)              | 159.6 ( $\pm 14.2$ )             | 44 (44.9)              | 155.9 ( $\pm 12.2$ )             |
| DBP (mmHg)                          | 122 (95.3)              | 71.1 ( $\pm 11.6$ )              | 48 (63.2)              | 80.6 ( $\pm 11.4$ )              | 95 (96.9)              | 74.4 ( $\pm 11.9$ )              |
| Low DBP (<70 mmHg)                  | 44 (34.4)               | 58.5 ( $\pm 6.7$ )               | 5 (6.6)                | 62.2 ( $\pm 4.1$ )               | 29 (29.6)              | 60.2 ( $\pm 6.4$ )               |
| Total protein (g/24h urine)         | 118 (92.2)              | 1.3 [0.5-2.7] <sup>a</sup>       | 40 (52.6)              | 1.9 [0.9-4.1] <sup>a</sup>       | 49 (50.0)              | 1.0 [0.4-2.6] <sup>a</sup>       |
| Total protein (g/l urine)           | 118 (92.2)              | 0.7 [0.3-1.4] <sup>a</sup>       | 57 (75.0)              | 1.4 [0.5-2.4] <sup>a</sup>       | 73 (74.5)              | 0.6 [0.3-1.1] <sup>a</sup>       |
| Proteinuria (>0.5 g/24h or L urine) | 84 (65.6)               |                                  | 57 (60.5)              |                                  | 48 (49.0)              |                                  |
| Phosphate (mmol/l)                  | 125 (97.7)              | 1.55 ( $\pm 0.39$ )              | 71 (93.4)              | 1.47 ( $\pm 0.42$ )              | 97 (99.0)              | 1.39 ( $\pm 0.36$ )              |
| Elevated phosphate (>1.49 mmol/l)   | 57 (44.5)               | 1.86 ( $\pm 0.36$ )              | 24 (31.6)              | 1.92 ( $\pm 0.39$ )              | 30 (30.6)              | 1.79 ( $\pm 0.34$ )              |
| Calcium (mmol/l)                    | 126 (98.4)              | 2.31 ( $\pm 0.16$ )              | 74 (97.4)              | 2.27 ( $\pm 0.19$ )              | 98 (100)               | 2.32 ( $\pm 0.14$ )              |
| Elevated Calcium (>2.54 mmol/l)     | 13 (10.2)               | 2.65 ( $\pm 0.07$ )              | 5 (6.6)                | 2.63 ( $\pm 0.08$ )              | 5 (5.1)                | 2.66 ( $\pm 0.11$ )              |
| Haemoglobin level (mmol/l)          | 127 (99.2)              | 7.0 ( $\pm 0.8$ )                | 76 (100)               | 7.0 ( $\pm 1.2$ )                | 98 (100)               | 7.0 ( $\pm 0.9$ )                |
| Low haemoglobin level (<7.5 mmol/l) | 88 (68.8)               | 6.6 ( $\pm 0.5$ )                | 54 (71.1)              | 6.4 ( $\pm 0.8$ )                | 68 (69.4)              | 6.6 ( $\pm 0.7$ )                |

CKD: chronic kidney disease; SD: standard deviation; eGFR: estimated glomerular filtration rate; MDRD: Modification of Diet in Renal Disease; SBP: systolic blood pressure; DBP: diastolic blood pressure.

Clinic A and B: university nephrology outpatient clinics; clinic C: non-university nephrology outpatient clinic.

<sup>a</sup> Median with interquartile range.
