# Supplementary material
Source: HighWire-hosted journal article supplement (https://bmjopen.bmj.com/content/9/7/e025784)
Supplement: inline-supplementary-material-3 [file inline-supplementary-material-3.pdf]

**S3 Table. Differences between nephrology outpatient clinics per indicator stratified for chronic kidney disease stage.**

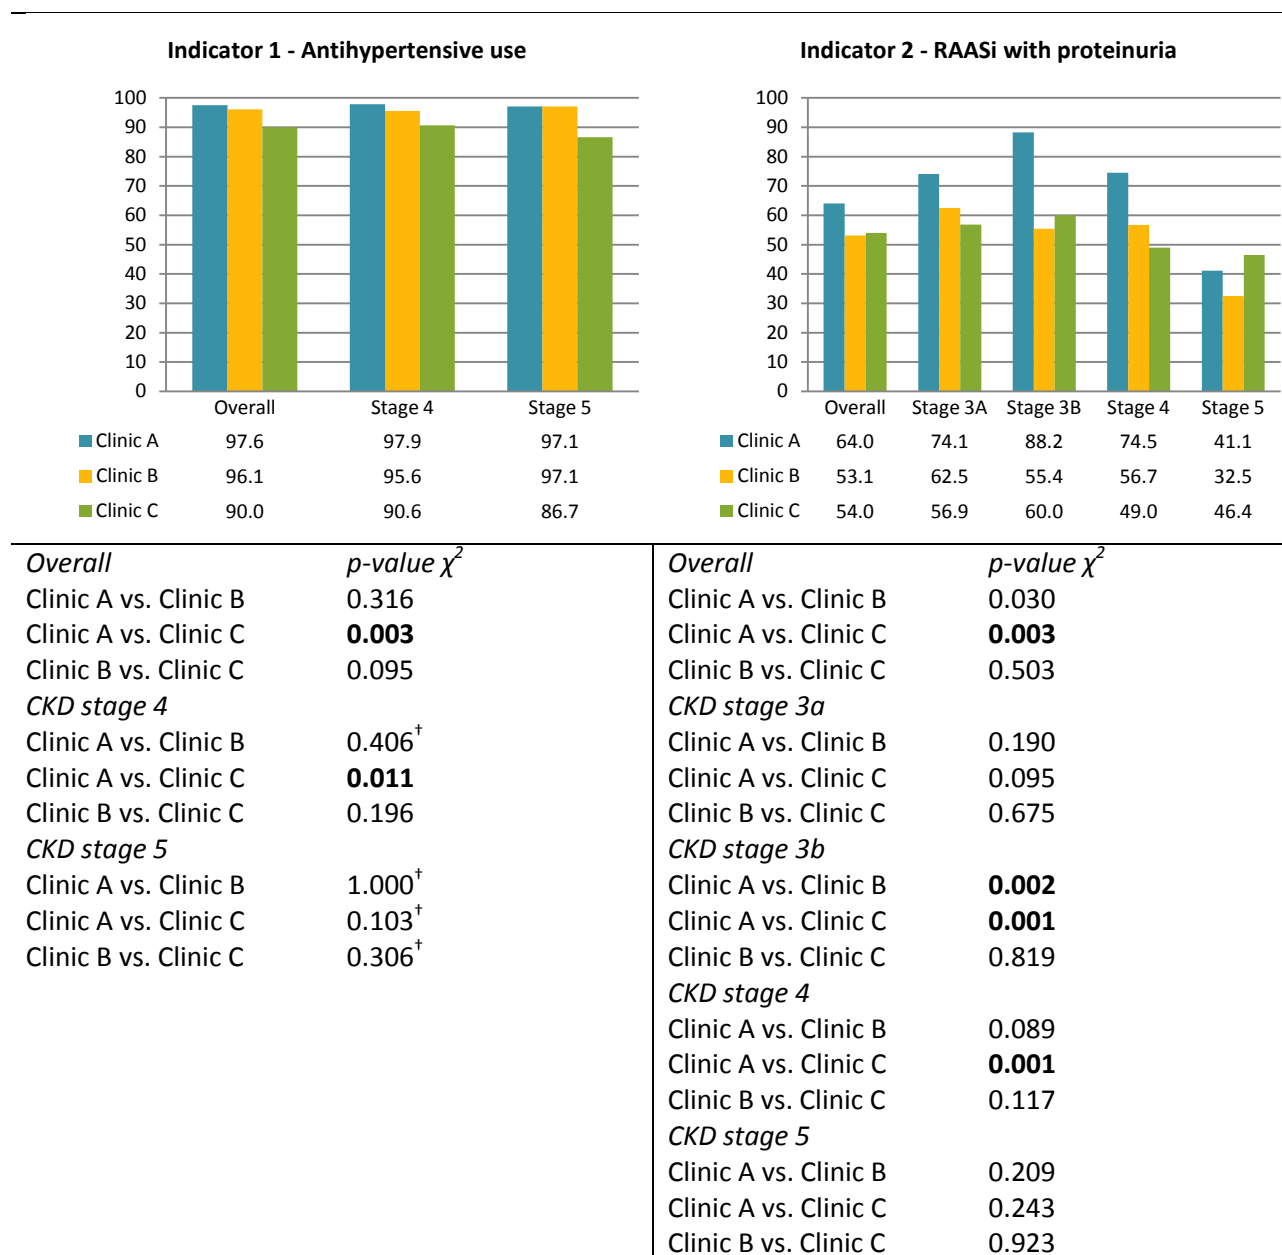

**Indicator 4 - RAAs and diuretics**

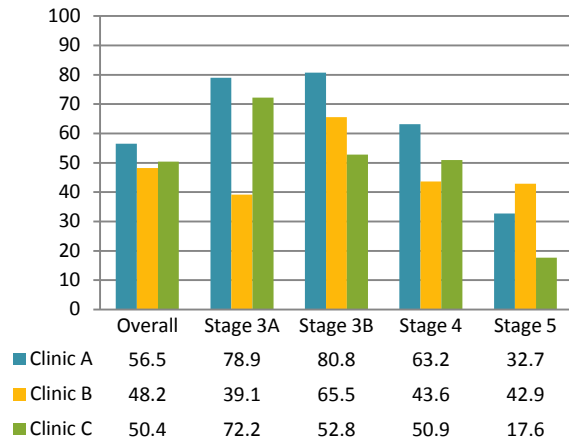

**Indicator 6 - Statin use**

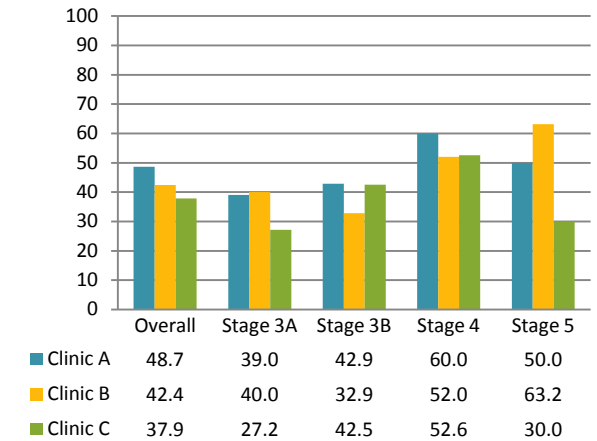

| Overall               | <i>p</i> -value $\chi^2$ |
|-----------------------|--------------------------|
| Clinic A vs. Clinic B | 0.184                    |
| Clinic A vs. Clinic C | 0.081                    |
| Clinic B vs. Clinic C | 0.786                    |
| <i>CKD stage 3a</i>   |                          |
| Clinic A vs. Clinic B | <b>0.014</b>             |
| Clinic A vs. Clinic C | 1.000                    |
| Clinic B vs. Clinic C | <b>0.014</b>             |
| <i>CKD stage 3b</i>   |                          |
| Clinic A vs. Clinic B | 0.068                    |
| Clinic A vs. Clinic C | <b>0.002</b>             |
| Clinic B vs. Clinic C | 0.235                    |
| <i>CKD stage 4</i>    |                          |
| Clinic A vs. Clinic B | 0.245                    |
| Clinic A vs. Clinic C | 0.337                    |
| Clinic B vs. Clinic C | 0.766                    |
| <i>CKD stage 5</i>    |                          |
| Clinic A vs. Clinic B | 0.586                    |
| Clinic A vs. Clinic C | 0.033                    |
| Clinic B vs. Clinic C | 0.021                    |

| Overall               | <i>p</i> -value $\chi^2$ |
|-----------------------|--------------------------|
| Clinic A vs. Clinic B | 0.205                    |
| Clinic A vs. Clinic C | <b>0.015</b>             |
| Clinic B vs. Clinic C | 0.277                    |
| <i>CKD stage 3a</i>   |                          |
| Clinic A vs. Clinic B | 0.916                    |
| Clinic A vs. Clinic C | 0.140                    |
| Clinic B vs. Clinic C | 0.042                    |
| <i>CKD stage 3b</i>   |                          |
| Clinic A vs. Clinic B | 0.266                    |
| Clinic A vs. Clinic C | 0.966                    |
| Clinic B vs. Clinic C | 0.189                    |
| <i>CKD stage 4</i>    |                          |
| Clinic A vs. Clinic B | 0.409                    |
| Clinic A vs. Clinic C | 0.395                    |
| Clinic B vs. Clinic C | 0.950                    |
| <i>CKD stage 5</i>    |                          |
| Clinic A vs. Clinic B | 0.340                    |
| Clinic A vs. Clinic C | 0.309 <sup>†</sup>       |
| Clinic B vs. Clinic C | 0.128 <sup>†</sup>       |

**Indicator 7 - Phosphate binder use**

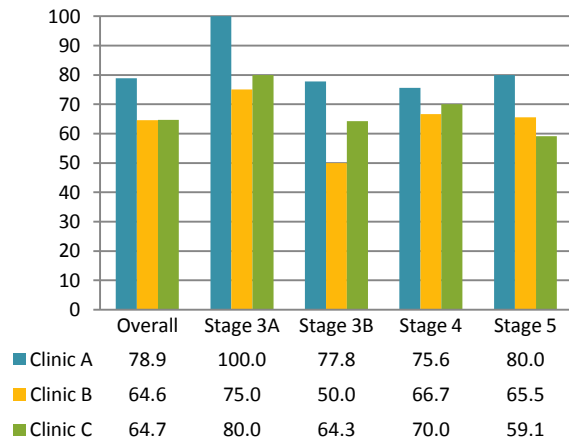

**Indicator 10 - Dual RAAS blockade**

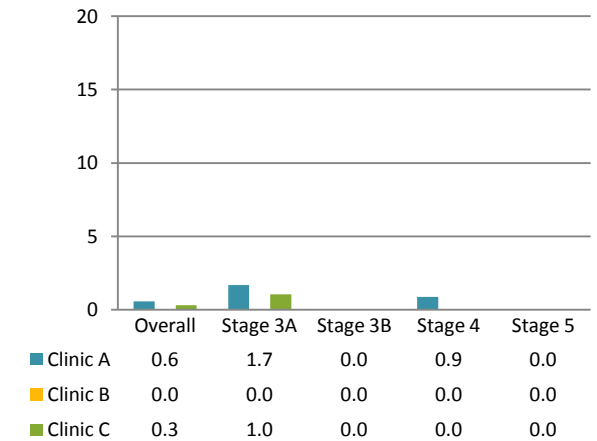

| Overall               | <i>p</i> -value $\chi^2$ |
|-----------------------|--------------------------|
| Clinic A vs. Clinic B | <b>0.016</b>             |

| Overall               | <i>p</i> -value $\chi^2$ |
|-----------------------|--------------------------|
| Clinic A vs. Clinic B | 0.218 <sup>†</sup>       |

|                       |                    |                       |                    |
|-----------------------|--------------------|-----------------------|--------------------|
| Clinic A vs. Clinic C | 0.030              | Clinic A vs. Clinic C | 0.612 <sup>†</sup> |
| Clinic B vs. Clinic C | 0.849              | Clinic B vs. Clinic C | 0.530 <sup>†</sup> |
| <i>CKD stage 3a</i>   |                    |                       |                    |
| Clinic A vs. Clinic B | 1.000 <sup>†</sup> | Clinic A vs. Clinic B | 0.323 <sup>†</sup> |
| Clinic A vs. Clinic C | 1.000 <sup>†</sup> | Clinic A vs. Clinic C | 0.558 <sup>†</sup> |
| Clinic B vs. Clinic C | 1.000 <sup>†</sup> | Clinic B vs. Clinic C | 0.521 <sup>†</sup> |
| <i>CKD stage 3b</i>   |                    |                       |                    |
| Clinic A vs. Clinic B | 0.650 <sup>†</sup> | Clinic A vs. Clinic B | No prescriptions   |
| Clinic A vs. Clinic C | 1.000 <sup>†</sup> | Clinic A vs. Clinic C | No prescriptions   |
| Clinic B vs. Clinic C | 0.692 <sup>†</sup> | Clinic B vs. Clinic C | No prescriptions   |
| <i>CKD stage 4</i>    |                    |                       |                    |
| Clinic A vs. Clinic B | 0.191              | Clinic A vs. Clinic B | 1.000 <sup>†</sup> |
| Clinic A vs. Clinic C | 0.548              | Clinic A vs. Clinic C | 0.391 <sup>†</sup> |
| Clinic B vs. Clinic C | 0.620              | Clinic B vs. Clinic C | No prescriptions   |
| <i>CKD stage 5</i>    |                    |                       |                    |
| Clinic A vs. Clinic B | 0.067              | Clinic A vs. Clinic B | No prescriptions   |
| Clinic A vs. Clinic C | <b>0.013</b>       | Clinic A vs. Clinic C | No prescriptions   |
| Clinic B vs. Clinic C | 0.575              | Clinic B vs. Clinic C | No prescriptions   |

Indicator 11 - Vitamin D use

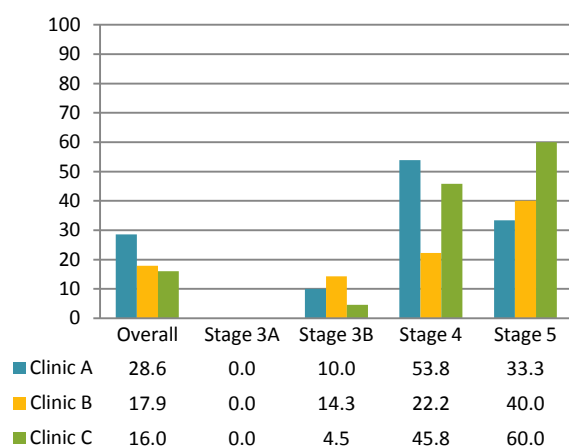

Indicator 12 - ESA use

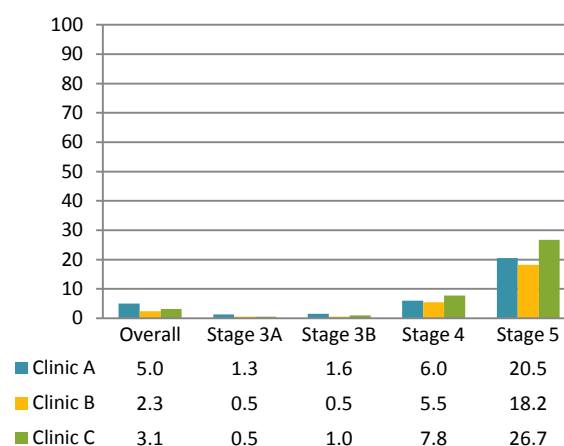

|                       |                         |                       |                         |
|-----------------------|-------------------------|-----------------------|-------------------------|
| <i>Overall</i>        | <i>p-value</i> $\chi^2$ | <i>Overall</i>        | <i>p-value</i> $\chi^2$ |
| Clinic A vs. Clinic B | 0.321                   | Clinic A vs. Clinic B | 0.034                   |
| Clinic A vs. Clinic C | 0.105                   | Clinic A vs. Clinic C | 0.100                   |
| Clinic B vs. Clinic C | 0.779 <sup>†</sup>      | Clinic B vs. Clinic C | 0.375                   |
| <i>CKD stage 3a</i>   |                         |                       |                         |
| Clinic A vs. Clinic B | No prescriptions        | Clinic A vs. Clinic B | 0.469 <sup>†</sup>      |
| Clinic A vs. Clinic C | No prescriptions        | Clinic A vs. Clinic C | 0.417 <sup>†</sup>      |
| Clinic B vs. Clinic C | No prescriptions        | Clinic B vs. Clinic C | 1.000 <sup>†</sup>      |
| <i>CKD stage 3b</i>   |                         |                       |                         |
| Clinic A vs. Clinic B | 1.000 <sup>†</sup>      | Clinic A vs. Clinic B | 0.562 <sup>†</sup>      |
| Clinic A vs. Clinic C | 0.466 <sup>†</sup>      | Clinic A vs. Clinic C | 0.637 <sup>†</sup>      |
| Clinic B vs. Clinic C | 0.364 <sup>†</sup>      | Clinic B vs. Clinic C | 0.678 <sup>†</sup>      |
| <i>CKD stage 4</i>    |                         |                       |                         |
| Clinic A vs. Clinic B | 0.203 <sup>†</sup>      | Clinic A vs. Clinic B | 0.864                   |
| Clinic A vs. Clinic C | 0.642                   | Clinic A vs. Clinic C | 0.558                   |
| Clinic B vs. Clinic C | 0.263 <sup>†</sup>      | Clinic B vs. Clinic C | 0.398                   |
| <i>CKD stage 5</i>    |                         |                       |                         |
| Clinic A vs. Clinic B | 1.000 <sup>†</sup>      | Clinic A vs. Clinic B | 1.000 <sup>†</sup>      |
| Clinic A vs. Clinic C | 0.567 <sup>†</sup>      | Clinic A vs. Clinic C | 0.548                   |

Clinic B vs. Clinic C

1.000<sup>†</sup>

Clinic B vs. Clinic C

0.473

Indicator 13 - NSAIDs use

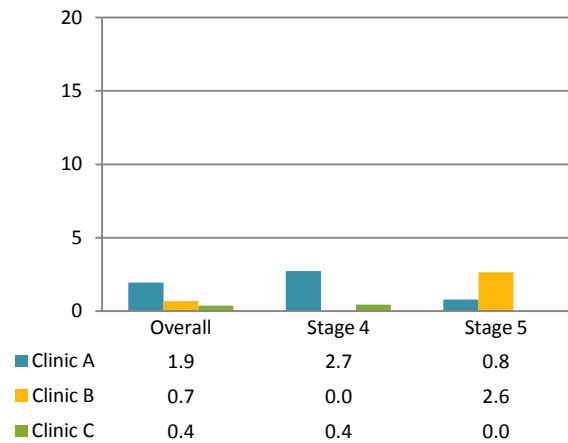

Indicator 14 - Metformin use

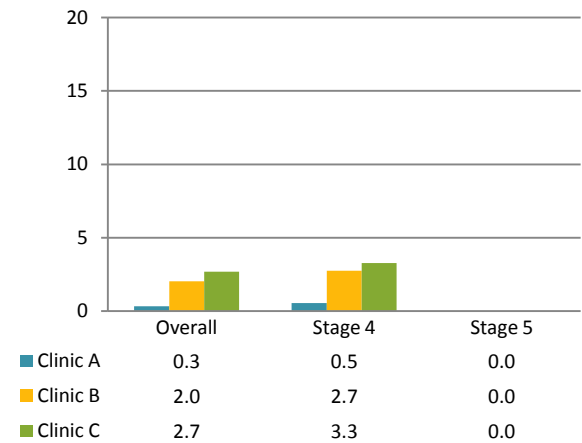*Overall**p-value*  $\chi^2$ 

Clinic A vs. Clinic B

0.287<sup>†</sup>

Clinic A vs. Clinic C

0.028<sup>†</sup>

Clinic B vs. Clinic C

0.612<sup>†</sup>*CKD stage 4*

Clinic A vs. Clinic B

0.019<sup>†</sup>

Clinic A vs. Clinic C

0.022<sup>†</sup>

Clinic B vs. Clinic C

1.000<sup>†</sup>*CKD stage 5*

Clinic A vs. Clinic B

0.557<sup>†</sup>

Clinic A vs. Clinic C

1.000<sup>†</sup>

Clinic B vs. Clinic C

0.189<sup>†</sup>*Overall**p-value*  $\chi^2$ 

Clinic A vs. Clinic B

0.062

Clinic A vs. Clinic C

**0.013**

Clinic B vs. Clinic C

0.558

*CKD stage 4*

Clinic A vs. Clinic B

0.132<sup>†</sup>

Clinic A vs. Clinic C

0.050<sup>†</sup>

Clinic B vs. Clinic C

0.714

*CKD stage 5*

Clinic A vs. Clinic B

No prescriptions

Clinic A vs. Clinic C

No prescriptions

Clinic B vs. Clinic C

No prescriptions

Indicator 15 - HD digoxin use

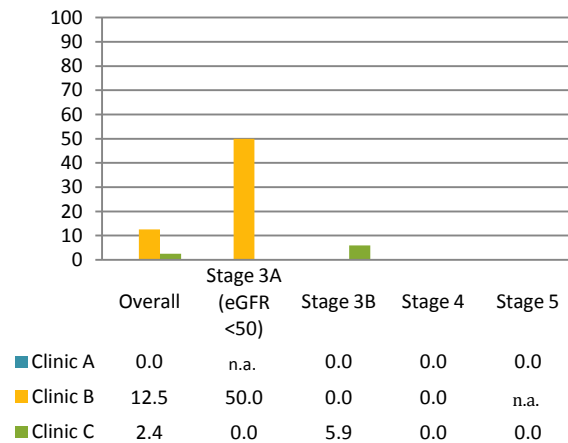

Indicator 16 - NSAIDs, RAAS and diuretics

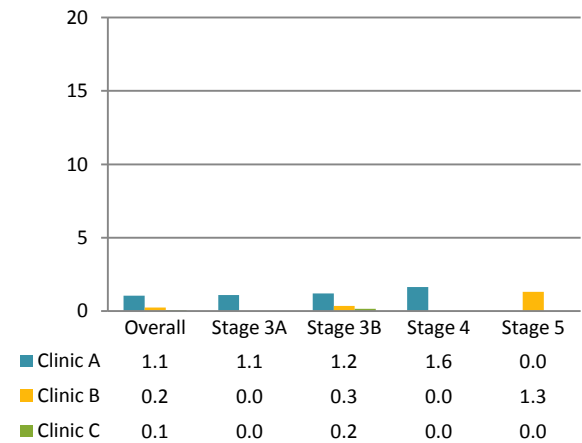*Overall**p-value*  $\chi^2$ 

Clinic A vs. Clinic B

1.000<sup>†</sup>

Clinic A vs. Clinic C

1.000<sup>†</sup>

Clinic B vs. Clinic C

0.202<sup>†</sup>*CKD stage 3a*

Clinic A vs. Clinic B

No prescriptions

Clinic A vs. Clinic C

No prescriptions

Clinic B vs. Clinic C

0.333<sup>†</sup>*CKD stage 3b**Overall**p-value*  $\chi^2$ 

Clinic A vs. Clinic B

0.067<sup>†</sup>

Clinic A vs. Clinic C

**0.001**<sup>†</sup>

Clinic B vs. Clinic C

0.254<sup>†</sup>*CKD stage 3a*

Clinic A vs. Clinic B

0.265<sup>†</sup>

Clinic A vs. Clinic C

0.156<sup>†</sup>

Clinic B vs. Clinic C

No prescriptions

*CKD stage 3b*

|                       |                    |                       |                    |
|-----------------------|--------------------|-----------------------|--------------------|
| Clinic A vs. Clinic B | No prescriptions   | Clinic A vs. Clinic B | 0.295 <sup>†</sup> |
| Clinic A vs. Clinic C | 1.000 <sup>†</sup> | Clinic A vs. Clinic C | 0.104 <sup>†</sup> |
| Clinic B vs. Clinic C | 1.000 <sup>†</sup> | Clinic B vs. Clinic C | 0.521 <sup>†</sup> |
| <i>CKD stage 4</i>    |                    | <i>CKD stage 4</i>    |                    |
| Clinic A vs. Clinic B | No prescriptions   | Clinic A vs. Clinic B | 0.093 <sup>†</sup> |
| Clinic A vs. Clinic C | No prescriptions   | Clinic A vs. Clinic C | 0.023 <sup>†</sup> |
| Clinic B vs. Clinic C | No prescriptions   | Clinic B vs. Clinic C | 1.000 <sup>†</sup> |
| <i>CKD stage 5</i>    |                    | <i>CKD stage 5</i>    |                    |
| Clinic A vs. Clinic B | No prescriptions   | Clinic A vs. Clinic B | 0.373 <sup>†</sup> |
| Clinic A vs. Clinic C | No prescriptions   | Clinic A vs. Clinic C | No prescriptions   |
| Clinic B vs. Clinic C | No prescriptions   | Clinic B vs. Clinic C | 0.437 <sup>†</sup> |

CKD: chronic kidney disease; RAAS: renin-angiotensin-aldosterone system; ESA: erythropoiesis-stimulating agent; NSAID: non-steroidal anti-inflammatory drug.

Clinic A and B: university nephrology outpatient clinics; clinic C: non-university nephrology outpatient clinic.

Indicators 3, 5, 8 and 9 were excluded because of insufficient validity.

<sup>†</sup> Fisher's exact because of <5 expected number of patients in one or more cells.
